# Supplementary material for: Effect of glucagon-like peptide-1 receptor agonists on glycemic control, and weight reduction in adults: A multivariate meta-analysis
Source: PubMed Central journal article supplement (PMC9876280; doi:10.1371/journal.pone.0278685), 2023-01-25
Supplement: pone.0278685.s006.pdf [file pone.0278685.s006.pdf]

**S4 Table. Sensitivity analysis of the pooled results for glycated hemoglobin level and weight reduction on comparison of glucagon-like peptide-1 receptor agonist and placebo by using the structural equation modeling multivariate meta-analysis according to participant characteristics.**

|                                                    | All participants     |         |       | Patients with diabetes |         |       |
|----------------------------------------------------|----------------------|---------|-------|------------------------|---------|-------|
| <b>Setting <math>r = 0.1</math></b>                | Estimates (95% CI)   | $p$     | $I^2$ | Estimates (95% CI)     | $p$     | $I^2$ |
| Glycated hemoglobin (%)                            | -0.85 (-1.03, -0.66) | < 0.001 | 99 %  | -0.96 (0.09, -1.14)    | < 0.001 | 96 %  |
| Body weight (kg)                                   | -4.03 (-5.10, -2.95) | < 0.001 | 99 %  | -3.23 (0.32, -3.86)    | < 0.001 | 95 %  |
| tau of glycated hemoglobin                         | 0.18 (0.07, 0.30)    | 0.002   |       | 0.13 (0.05, 0.03)      | 0.008   |       |
| tau of body weight                                 | 7.36 (3.10, 11.62)   | 0.001   |       | 1.77 (0.62, 0.56)      | 0.004   |       |
| Covariance                                         | -0.48 (-1.02, 0.06)  | 0.081   |       | 0.16 (0.14, -0.12)     | 0.256   |       |
| Standardized correlation coefficient               | -0.41                |         |       | 0.33                   |         |       |
| <b>Setting <math>r = 0.3</math></b>                | All participants     |         |       | Patients with diabetes |         |       |
| Glycated hemoglobin (%)                            | -0.85 (-1.03, -0.66) | < 0.001 | 99 %  | -0.96 (0.09, -1.14)    | < 0.001 | 96 %  |
| Body weight (kg)                                   | -4.03 (-5.11, -2.95) | < 0.001 | 99 %  | -3.23 (0.32, -3.87)    | < 0.001 | 96 %  |
| tau of glycated hemoglobin                         | 0.18 (0.07, 0.30)    | 0.002   |       | 0.13 (0.05, 0.03)      | 0.008   |       |
| tau of body weight                                 | 7.37 (3.10, 11.64)   | 0.001   |       | 1.77 (0.62, 0.56)      | 0.004   |       |
| Covariance                                         | -0.49 (-1.02, 0.05)  | 0.076   |       | 0.15 (0.14, -0.13)     | 0.308   |       |
| Standardized correlation coefficient               | -0.42                |         |       | 0.30                   |         |       |
| <b>Restricted to studies with low risk of bias</b> | All participants     |         |       | Patients with diabetes |         |       |
| Glycated hemoglobin (%)                            | -0.83 (-1.01, 0.09)  | < 0.001 | 99 %  | -0.96 (0.09, -1.14)    | < 0.001 | 96 %  |
| Body weight (kg)                                   | -4.32(-5.46, 0.58)   | < 0.001 | 99 %  | -3.25 (0.35, -3.93)    | < 0.001 | 96 %  |

|                                      |                     |       |                    |       |
|--------------------------------------|---------------------|-------|--------------------|-------|
| tau of glycated hemoglobin           | 0.18 (0.06, 0.07)   | 0.002 | 0.13 (0.05, 0.03)  | 0.008 |
| tau of body weight                   | 7.26 (2.79, 2.28)   | 0.001 | 1.87 (0.68, 0.54)  | 0.006 |
| Covariance                           | -0.48 (-1.02, 0.27) | 0.081 | 0.16 (0.15, -0.13) | 0.287 |
| Standardized correlation coefficient | -0.42               |       | 0.32               |       |

---

CI, confidence interval;  $r$ , the correlation coefficient between glycated hemoglobin and body weight changes within the study level; tau, the variance of effect measure. Further sensitivity analyses of participants without diabetes were not performed due to the limited included articles.
